# Supplementary material for: Interconnected channels through polypropylene and cellulose acetate by utilizing lactic acid for stable separators
Source: Royal Society of Chemistry journal article supplement (doi:10.1039/d1cc02955j), 2021-01-01
Supplement: d1cc02955j1.pdf [file d1cc02955j1.pdf]

## Supporting information

**Interconnected channels through polypropylene and cellulose**

**acetate by utilizing lactic acid for stable separators**

So Hee Kim<sup>a</sup> and Sang Wook Kang<sup>\*ab</sup>

<sup>a</sup> *Department of Chemistry, Sangmyung University, Seoul 03016, Republic of Korea*

<sup>b</sup> *Department of Chemistry and Energy Engineering, Sangmyung University, Seoul 03016, Republic of Korea, E-mail: swkang@smu.ac.kr*

*E-mail: swkang@smu.ac.kr*

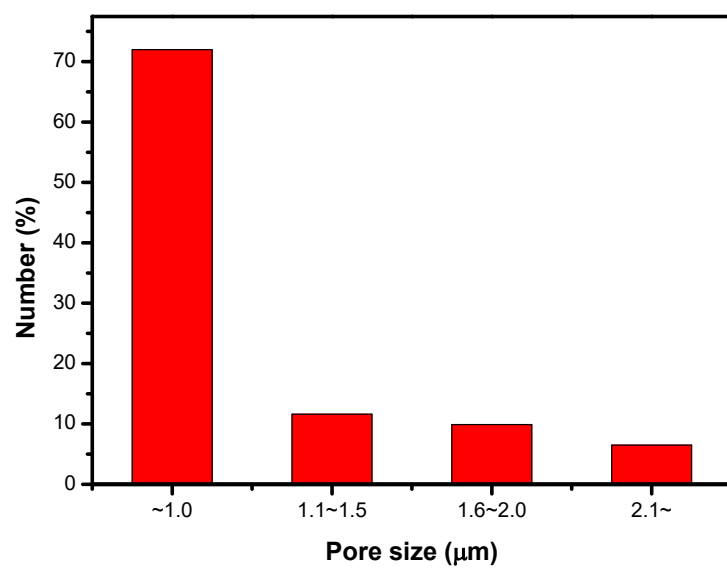

**Figure S1. Size distribution plot of the pore size**

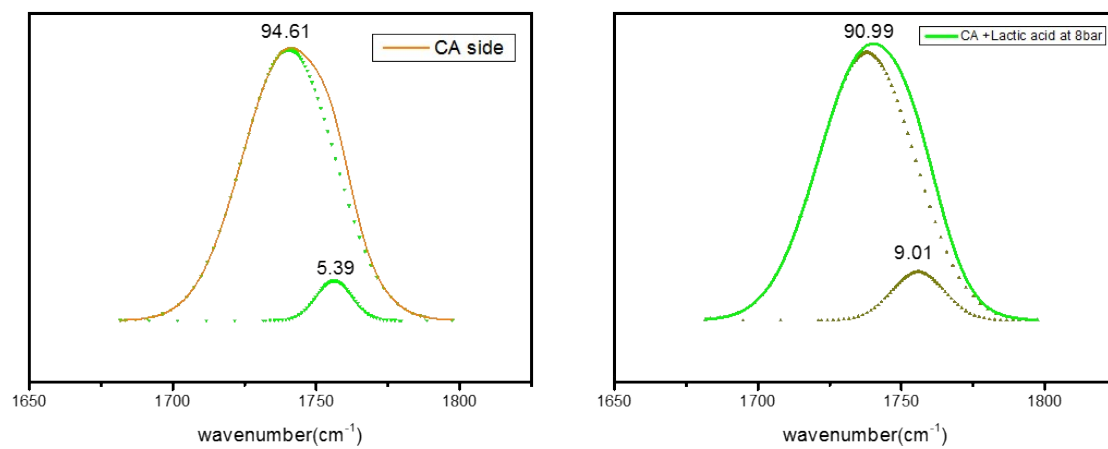

**Figure S2 Deconvolution of CA side in CA-lactic acid film (C=O peak)**

**Figure S3. The comparison of area ratio (C=O peak)**

|                                  | <b>CA-lactic acid at 8 bar</b> | <b>CA side (CA-PP)</b> |
|----------------------------------|--------------------------------|------------------------|
| <b>1737~1740 cm<sup>-1</sup></b> | 90.99%                         | 94.61%                 |
| <b>1755~1756 cm<sup>-1</sup></b> | 9.01%                          | 5.39%                  |

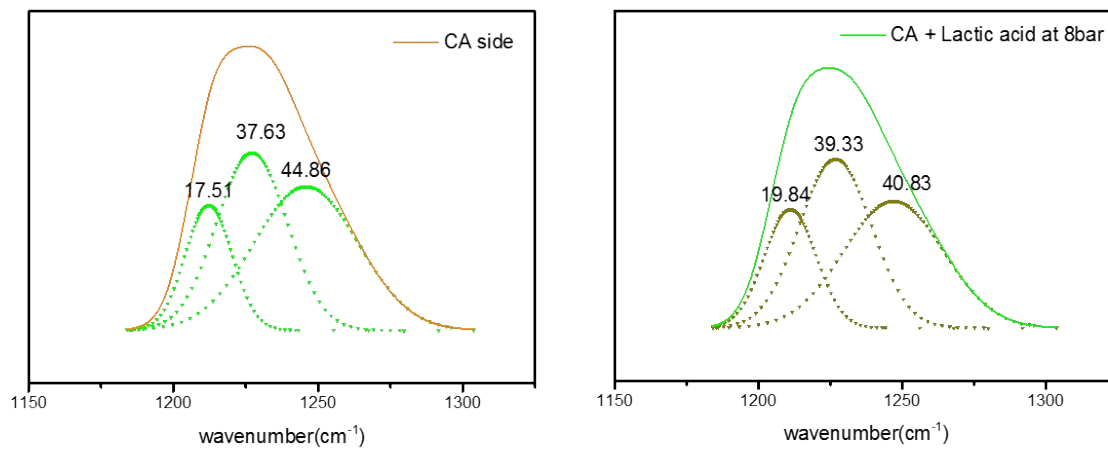

**Figure S4 Deconvolution of CA side in CA-lactic acid film (C-O-C peak)**

**Figure S5. The comparison of area ratio (C-O-C peak)**

|                                  | <b>CA-Lactic acid at 8bar</b> | <b>CA side (CA-PP)</b> |
|----------------------------------|-------------------------------|------------------------|
| <b>1211~1212 cm<sup>-1</sup></b> | 19.84%                        | 17.51%                 |
| <b>1226~1227 cm<sup>-1</sup></b> | 39.33%                        | 37.63%                 |
| <b>1245~1247 cm<sup>-1</sup></b> | 40.83%                        | 44.86%                 |

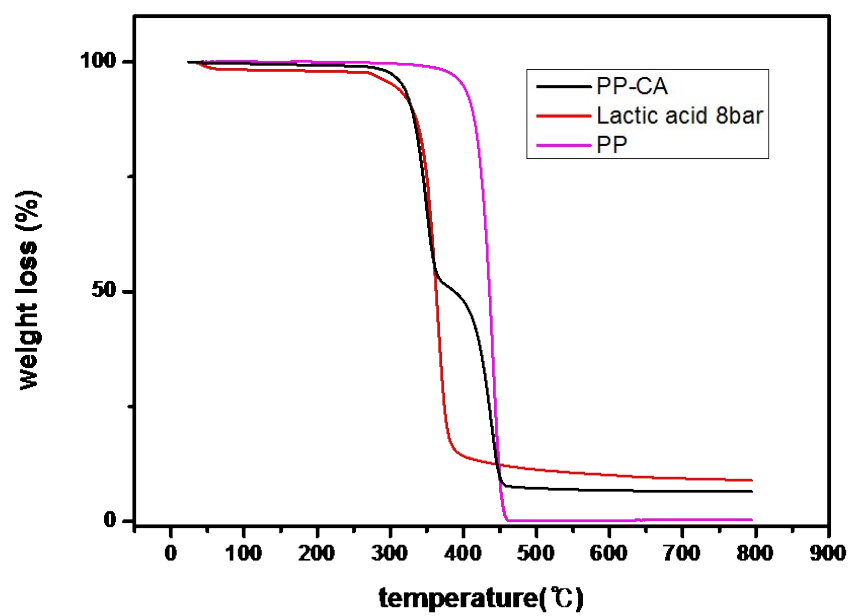

Figure S6. TGA data

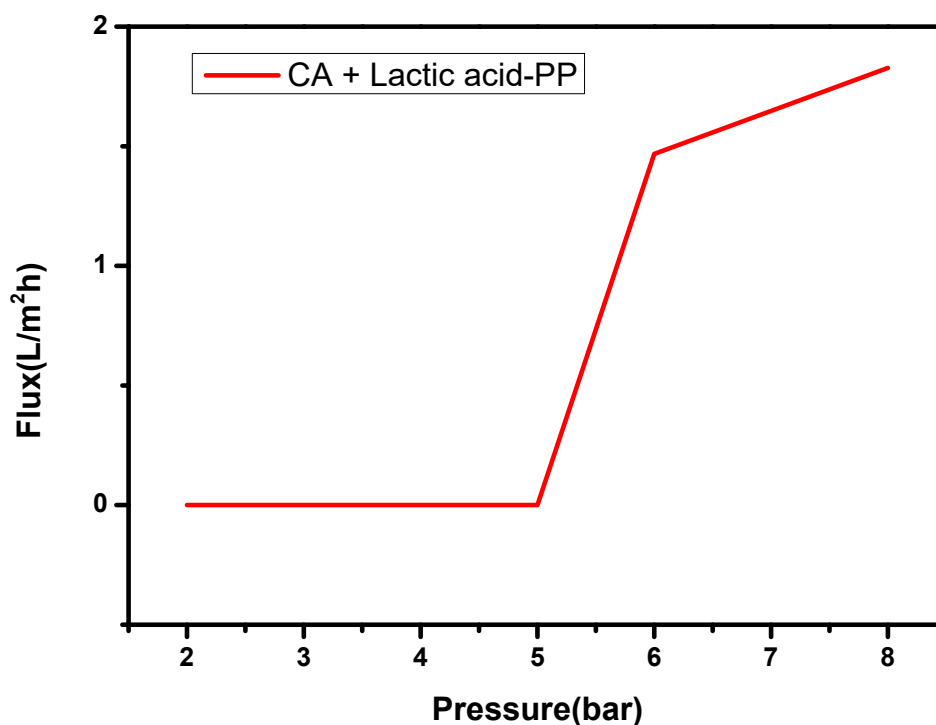

**Figure S7. Water flux data**

When the film was prepared, the longer the drying time was, the larger the threshold was, and it was observed that the pores were formed at 8 bar when the film was dried for 30 minutes. The average flux measured at 8 bar was 1.83 L/m<sup>2</sup>h. Once a channel was formed between the two polymers, it was confirmed that the water flux had the same water flux even after 7 hours. The reason that the flux slope rapidly increased at 5~6 bar was attributable to that the pores were formed as most of the lactic acids were rapidly removed, and after that, since small amounts of lactic acid remained, a gradual slope was observed. It was experimentally confirmed that the pores were formed in the single CA film by water pressure at about 2-3bar, and the pores were formed in 4 bar by water pressure in neat PP. Compared with these results, the CA-PP separator was evaluated to have better physical stability than the existing CA and PP separators since pores were formed when a higher pressure was applied.
